# Supplementary material
Source: PubMed Central journal article supplement (PMC4447202)
Supplement: NIHMS690872-supplement-Figure_S1.pdf [file NIHMS690872-supplement-Figure_S1.pdf]

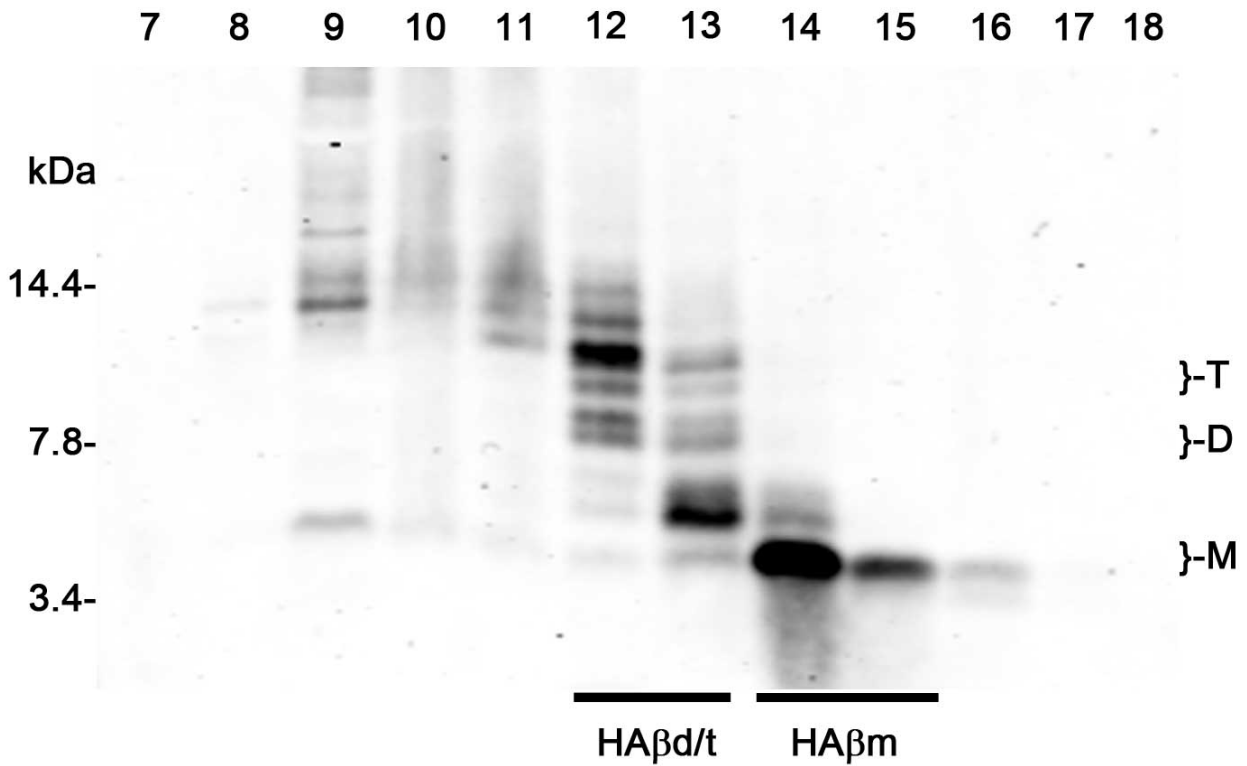

**Supplementary Figure 1.** Western blot showing fractions of the HAβm and HAβd/t from 10x concentrated culture medium of 7PA2 cells. Of each 1 ml fraction, 800 μl was removed and stored at –80°C. The remaining 200 μl was lyophilized, resuspended in 2x sample buffer, and electrophoresed on a 10–20% Tris-Tricine gel. Proteins were transferred onto 0.1 μm nitrocellulose and, after boiling the blot for 10 min, Aβ was detected by Western blotting with 6E10 mouse monoclonal antibody and DyLight secondary antibodies. Band fluorescence was captured with a LI-Cor Odyssey Infrared Imaging System. Fractions enriched in HAβm (fractions 14-15) or HAβd/t (fractions 12-13) were pooled separately, lyophilized, and stored at –80°C.
