# Supplementary material
Source: PubMed Central journal article supplement (PMC4447202)
Supplement: NIHMS690872-supplement-Figure_S2.pdf [file NIHMS690872-supplement-Figure_S2.pdf]

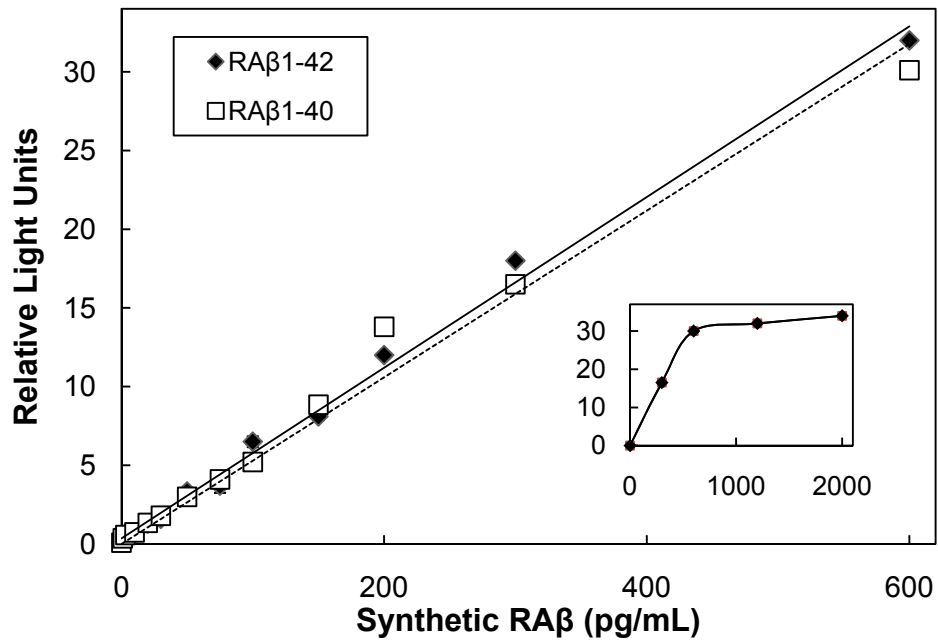

**Supplementary Figure 2.** RAβ ELISA standard curves comparing RAβ<sub>1-40</sub> and RAβ<sub>1-42</sub>.

There is no significant difference between the two RAβ species used in this assay.

Points are triplicate samples; error bars = standard deviation (less than the symbol size). Inset: The assay is linear between 10 pg/mL and 600 ng/mL. n=8
