# Supplementary material
Source: PubMed Central journal article supplement (PMC4447202)
Supplement: NIHMS690872-supplement-Figure_S3.pdf [file NIHMS690872-supplement-Figure_S3.pdf]

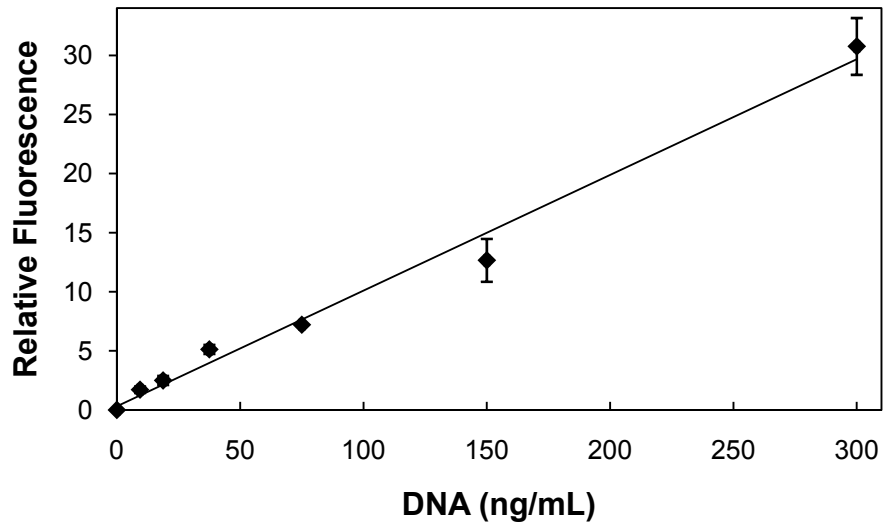

**Supplementary Figure 3.** DNA standard curves using calf thymus DNA dissolved in TE buffer as standard. Standards and cell lysates are diluted with TE buffer containing SybrGreen I and then assayed using a microtiterplate reader operating in the fluorescence mode. The assay is linear between 1-300 ng/mL of DNA, but linearity can be expanded by adjusting the intensity of the excitation source or exposure time. Points are triplicate samples; error bars = standard deviation.
