# Supplementary material
Source: PubMed Central journal article supplement (PMC4447202)
Supplement: NIHMS690872-supplement-text.pdf [file NIHMS690872-supplement-text.pdf]

**Supplementary Information for: Amyloid- $\beta$ -induced amyloid- $\beta$  secretion: A possible feed-forward mechanism in Alzheimer disease by Ian T. Marsden, Laurie S. Minamide, and James R. Bamberg published in Journal of Alzheimer Disease**

*Rodent total A $\beta$  ELISA*

RA $\beta$ <sub>1-40</sub> and RA $\beta$ <sub>1-42</sub> pellets were solubilized in 10  $\mu$ L of DMSO and diluted further with a phosphate buffered saline containing Tween and BSA (PBSTB; Covance). Wells to be used on the assay plate were washed 1x with PBSTB and standards or samples (100  $\mu$ L per well) were applied and plates incubated overnight at 4°C. Wells were washed 5x with 300 $\mu$ L PBSTB. SuperSignal ELISA Pico Chemiluminescent Substrate (Thermo Scientific) was added at 300 $\mu$ L to each well. Chemiluminescence was quantified by photon counting between 5 and 10 min after substrate addition using a Perkin-Elmer Victor V multi-mode microplate reader operating at room temperature with no filter. The optimal concentration of capture antibody that allowed for maximal binding of rodent A $\beta$  to the plate was determined to be 5  $\mu$ g/mL. Standard curves using 1.6  $\mu$ g/mL detection antibody and synthetic RA $\beta$ <sub>1-40</sub> and RA $\beta$ <sub>1-42</sub> between 0 and 1,200 pg/mL were identical for both forms of RA $\beta$  and were linear from 10-600 pg/mL (Supplementary Figure 2).

*Organotypic hippocampal slice cultures*

Ethanol washed coverslips (12x22mm) were treated with 2% 3-aminopropyltriethoxy-silane in acetone (10 sec dip), rinsed in water, air dried and UV sterilized. Chick plasma (2 x 4  $\mu$ L aliquots) was spread into two 5 mm diameter circles

near one end of the coverslip, two slices were placed side by side on the plasma and the slices were each covered with 4  $\mu$ L of fresh plasma/thrombin mixture (4  $\mu$ L chick plasma (Cocalico Biologicals Inc., Reamstown, PA) and 4  $\mu$ L thrombin (150 NIH units/mL; MP Biomedicals, Inc.) in Gey's BSS/glucose (per 100 ml: 97 ml Gey's BSS (Sigma), 2 ml 25% glucose, 1 mL Pen/Strep). After the plasma clotted, the coverslip was inserted into a flat sided tube (Nunclon Delta Tubes, Nalge Nunc, Rochester, NY) and 600  $\mu$ L slice culture medium added. Tubes were placed at a 5° angle in a roller incubator (10 revolutions per hour) at 35°C. The original slice medium (per 205 mL: 50 mL horse serum, 50 mL Hanks BSS, 4 mL 25% glucose, 100 mL minimum essential medium containing GlutaMAX (250  $\mu$ L/100 mL), HEPES (4.76g/ L) and Pen/Strep (1 mL)) was replaced on day 2 with Neurobasal A medium containing (per 50 mL): 48 mL Neurobasal A, 180  $\mu$ L 25% glucose, 625  $\mu$ L GlutaMAX 1, 1 mL B27 supplements and 250  $\mu$ L Pen/Strep. The Neurobasal A medium was replaced every 2-3 days. Slices were allowed to recover for at least 1 week after dissection before treatment.
